# Supplementary material
Source: PubMed Central journal article supplement (PMC9252442)
Supplement: NIHMS1817438-supplement-Supplement_2.pdf [file NIHMS1817438-supplement-Supplement_2.pdf]

## Supplementary Online Content

Grudzen CR, Richardson LD, Johnson PN, et al. Emergency department–initiated palliative care in advanced cancer: a randomized clinical trial. Published online January 14, 2016. *JAMA Oncol*. doi:10.1001/jamaoncol.2015.5252.

**eTable 1.** Eligibility Screening Table

**eFigure 1.** CONSORT Flow Diagram

**eTable 2.** Baseline Characteristics of the Study Participants

**eTable 3.** Health Care Utilization: Hospice Use

**eTable 4.** Health Care Utilization: Hospital Days

**eTable 5.** Health Care Utilization: ICU Admission

This supplementary material has been provided by the authors to give readers additional information about their work.

## eTable 1: Eligibility Screening Table

### Advanced Cancer Staging Criteria

Complete form for exclusions only if patient meets criteria on this decision tree.

Circle all that apply (you must circle at least one from column B and/or column C in order for subject to be eligible for participation): Column A must be circled.

| <b>A</b>                                                  | <b>B</b>                          | <b>C</b>                                                                                                                                                                                                            |
|-----------------------------------------------------------|-----------------------------------|---------------------------------------------------------------------------------------------------------------------------------------------------------------------------------------------------------------------|
| Laryngeal/Throat/Nasopharyngeal/Mouth a.k.a Head and Neck | Stage III<br>Stage IV             | "metastatic to", "locally advanced", "spread to regional LN" "refusing surgery/chemo", "not a surgical candidate", recurrent, other ( <i>specify</i> ___)                                                           |
| Lung or Non-small cell lung cancer (NSCLC)                | Stage IIIb<br>Stage IV            | "unresectable", "metastatic", "mets to", "refusing surgery/chemo" "not a surgical candidate", recurrent, other ( <i>specify</i> ___)                                                                                |
| Lung Small Cell                                           | Extensive Stage                   | "metastatic", "mets to", "refusing chemo", recurrent, other ( <i>specify</i> ___)                                                                                                                                   |
| Mesothelioma                                              | Stage III<br>Stage IV             | "unresectable", "metastatic", "mets to", "refusing surgery/chemo" "not a surgical candidate, recurrent, other ( <i>specify</i> ___)                                                                                 |
| Breast                                                    | Stage IV                          | "metastatic", "mets to", "spread to", other ( <i>specify</i> ___)                                                                                                                                                   |
| Esophageal                                                | Stage III<br>Stage IV             | "metastatic", "mets to", spread to, recurrent "unresectable", "locally advanced", "not a surgical candidate", other ( <i>specify</i> ___)                                                                           |
| Stomach/Gastric                                           | Stage III<br>Stage IV             | "metastatic", "mets to", spread to, recurrent "unresectable", "locally advanced", "not a surgical candidate" (exception for stage II gastric CA, not a surgical candidate is ELIGIBLE), other ( <i>specify</i> ___) |
| Pancreatic                                                | Stage III<br>Stage IV             | "metastatic", "mets to", spread to, recurrent "unresectable", "locally advanced", "not a surgical candidate", other ( <i>specify</i> ___)                                                                           |
| Gallbladder/Bile Duct/Cholangio/Ampullary                 | Stage II<br>Stage III<br>Stage IV | "metastatic", "mets to", spread to, recurrent "unresectable", "locally advanced", "not a surgical candidate", other ( <i>specify</i> ___)                                                                           |
| Liver/Hepatic, Hepato-cellular (HCC)                      | Stage III<br>Stage IV             | "metastatic", "mets to", spread to, recurrent "unresectable", "locally advanced", "not a surgical candidate", "ineligible/not a transplant candidate", ascites, other ( <i>specify</i> ___)                         |
| Colon/Rectum/Colo-rectal                                  | Stage IV<br>Dukes D               | "metastatic", "mets to", spread to, recurrent "unresectable", "locally advanced", "not a surgical candidate", other ( <i>specify</i> ___)                                                                           |
| Kidney/Renal Cell                                         | Stage IV                          | "metastatic", "mets to", spread to, recurrent "unresectable", "not a surgical candidate", other ( <i>specify</i> ___)                                                                                               |
| Ovarian                                                   | Stage III<br>Stage IV             | "metastatic", "mets to", spread to, recurrent "unresectable", "not a surgical candidate", other ( <i>specify</i> ___)                                                                                               |
| Endometrial/Uterine                                       | Stage IV                          | "metastatic", "mets to", spread to, recurrent "unresectable", "not a surgical candidate", other ( <i>specify</i> ___)                                                                                               |
| Cervical                                                  | Stage IV                          | "metastatic", "mets to", spread to, recurrent "unresectable", "not a surgical candidate", other ( <i>specify</i> ___)                                                                                               |
| Prostate                                                  | Stage IV                          | "metastatic", "mets to", spread to, recurrent, other ( <i>specify</i> ___)                                                                                                                                          |

| <b>A</b>                                                               | <b>B</b>              | <b>C</b>                                                                                                                                                                                                                                                            |
|------------------------------------------------------------------------|-----------------------|---------------------------------------------------------------------------------------------------------------------------------------------------------------------------------------------------------------------------------------------------------------------|
| Melanoma                                                               | Stage IV              | "metastatic", "mets to", spread to, recurrent, other ( <i>specify</i> ___)                                                                                                                                                                                          |
| Brain                                                                  | NA                    | Recurrent, relapsed, not a surgical candidate, mets to, refusing surgery/radiation, chemotherapy, other ( <i>specify</i> ___)                                                                                                                                       |
| Lymphoma                                                               | Stage III<br>Stage IV | Relapsed, not a chemo candidate, not a transplant candidate, relapsed after transplant, other ( <i>specify</i> ___)                                                                                                                                                 |
| Multiple myeloma                                                       | Stage III<br>Stage IV | Not a transplant candidate, relapse after transplant, other ( <i>specify</i> ___)                                                                                                                                                                                   |
| Sarcoma                                                                | Stage IV              | Not a transplant candidate, relapse after transplant, other ( <i>specify</i> ___)                                                                                                                                                                                   |
| Anal                                                                   | Stage IV              | "metastatic", "mets to", spread to, recurrent "unresectable", "locally advanced", "not a surgical candidate" , other ( <i>specify</i> ___)                                                                                                                          |
| Thyroid (eligible papillary, follicular, medullary and all anaplastic) | Stage IV              | Unresectable, metastatic, mets to, refusing chemo/surgery, not a surgical candidate, other ( <i>specify</i> ___)                                                                                                                                                    |
| Vulva                                                                  | Stage IV              | Unresectable, metastatic, mets to, refusing chemo/surgery, not a surgical candidate, other ( <i>specify</i> ___)                                                                                                                                                    |
| Penis                                                                  | Stage IV              | Unresectable, metastatic, mets to, refusing chemo/surgery, not a surgical candidate, other ( <i>specify</i> ___)                                                                                                                                                    |
| Osteosarcoma                                                           | Stage IV              | Unresectable, metastatic, mets to, refusing chemo/surgery, not a surgical candidate, other ( <i>specify</i> ___)                                                                                                                                                    |
| Sarcoma                                                                | Stage IV              | Unresectable, metastatic, mets to, refusing chemo/surgery, not a surgical candidate, other ( <i>specify</i> ___)                                                                                                                                                    |
| Carcinoid                                                              | Stage IV              | Unresectable, metastatic, mets to, refusing chemo/surgery, not a surgical candidate, other ( <i>specify</i> ___)                                                                                                                                                    |
| Other<br>*Confirm eligibility with PI/MSSM                             | NA                    | "metastatic", "mets to", spread to, recurrent "unresectable", "locally advanced", "spread to regional lymph node," "not a surgical candidate" , not a chemo candidate, not a transplant candidate, not a radiation candidate, relapsed, other ( <i>specify</i> ___) |

**eFigure1: CONSORT Flow Diagram**

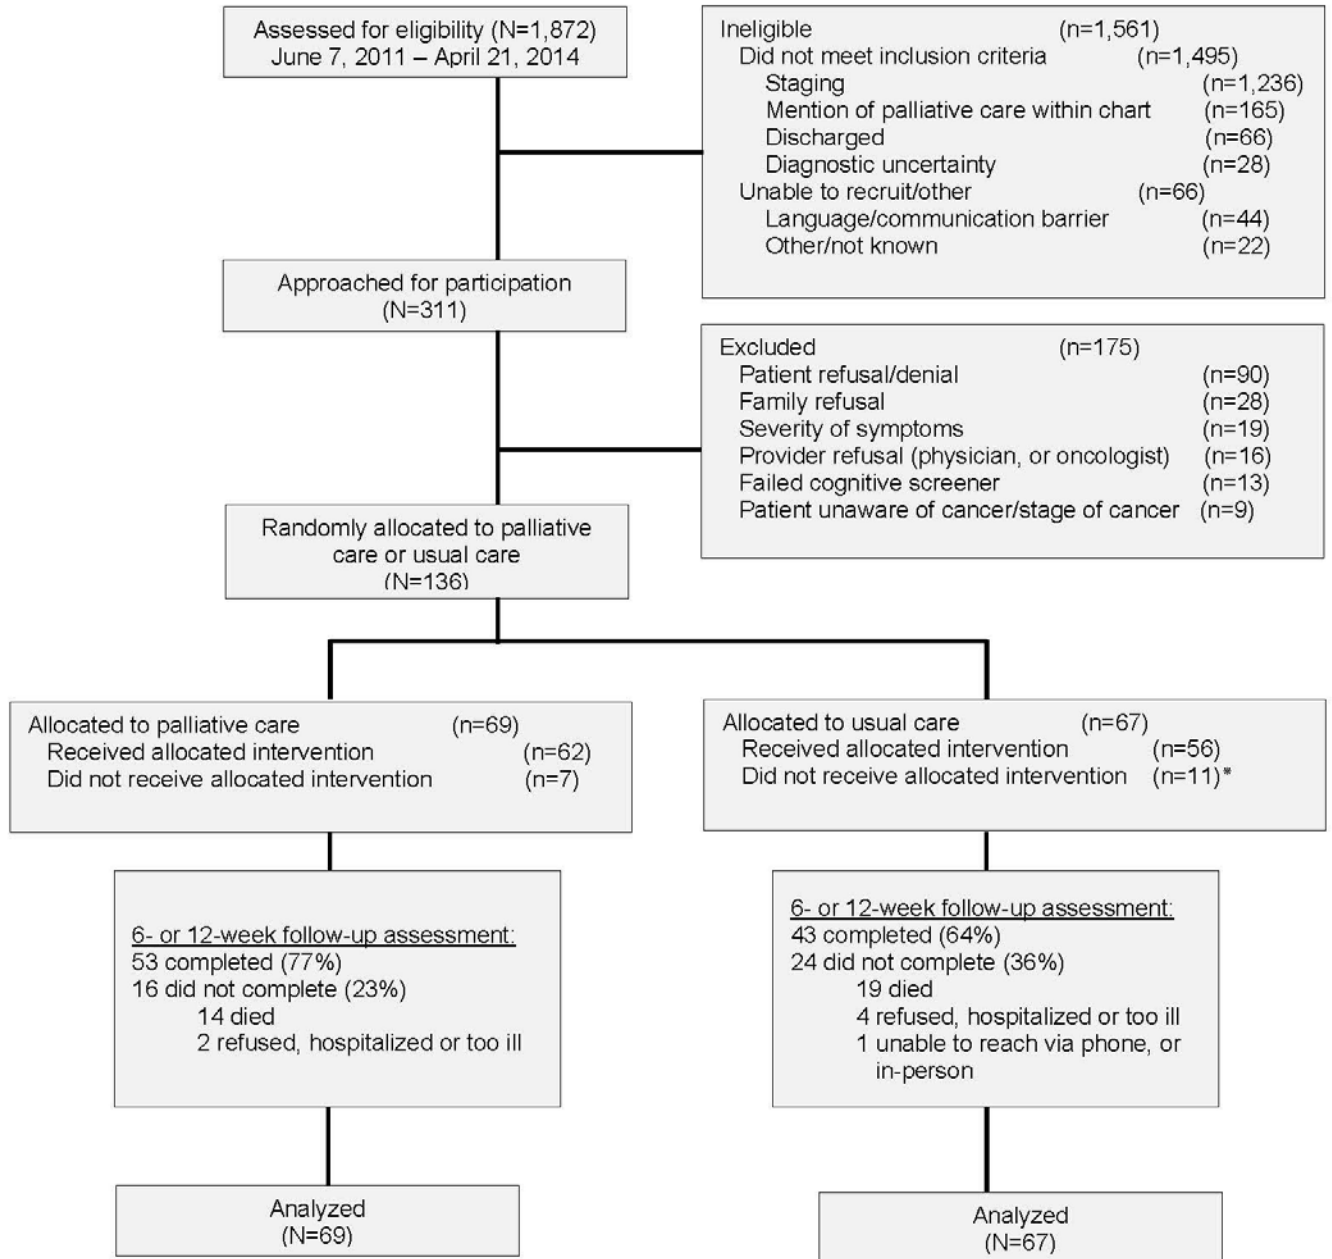

\* Patients randomized to usual care were not restricted from receiving palliative care if their physician requested. They were included in the usual care study arm.

**eTable 2. Baseline Characteristics of the Study Participants**

| <b>eTable 2. Baseline Characteristics of the Study Participants*</b> |                              |                                |                  |
|----------------------------------------------------------------------|------------------------------|--------------------------------|------------------|
| <b>Variable</b>                                                      | <b>Usual Care<br/>(N=67)</b> | <b>Intervention<br/>(N=69)</b> | <b>P-Value**</b> |
| Age – years                                                          | 57.8 ± 14.7                  | 55.1 ± 13.1                    | 0.16             |
| ECOG Score†                                                          | 1.87 ± 1.18                  | 1.78 ± 1.26                    | 0.70             |
| ECOG grade – no. (%)§                                                |                              |                                | 0.91             |
| 0                                                                    | 1 (16)                       | 14 (20)                        |                  |
| 1                                                                    | 14 (21)                      | 16 (23)                        |                  |
| 2                                                                    | 19 (28)                      | 15 (22)                        |                  |
| 3                                                                    | 19 (28)                      | 19 (27)                        |                  |
| 4                                                                    | 4 (6)                        | 5 (7)                          |                  |
| Female – no. (%)                                                     | 37 (55)                      | 39 (57)                        | 1.00             |
| Race – no. (%)                                                       |                              |                                | 0.80             |
| White                                                                | 20 (30)                      | 23 (34)                        |                  |
| Black                                                                | 15 (23)                      | 18 (27)                        |                  |
| Asian                                                                | 2 (3)                        | 4 (6)                          |                  |
| American Indian or Alaskan Native                                    | 2 (3)                        | 1 (1)                          |                  |
| More than one Race                                                   | 2 (3)                        | 1 (1)                          |                  |
| Other                                                                | 25 (38)                      | 20 (30)                        |                  |
| Hispanic or Latino – no. (%)                                         | 29 (43)                      | 20 (29)                        | 0.08             |
| Marital status – no. (%)                                             |                              |                                | 0.28             |
| Married                                                              | 26 (39)                      | 37 (54)                        |                  |
| Single                                                               | 14 (21)                      | 13 (19)                        |                  |
| Divorced or separated                                                | 17 (25)                      | 14 (20)                        |                  |
| Widowed                                                              | 10 (15)                      | 5 (7)                          |                  |
| Education –no. (%)                                                   |                              |                                | 0.49             |
| High school or less                                                  | 36 (54)                      | 32 (46)                        |                  |
| College or more                                                      | 31 (46)                      | 37 (54)                        |                  |

| <b>eTable 2. (Continued.)</b>     |                              |                                |                  |
|-----------------------------------|------------------------------|--------------------------------|------------------|
| <b>Variable</b>                   | <b>Usual Care<br/>(N=67)</b> | <b>Intervention<br/>(N=69)</b> | <b>P-Value**</b> |
| <\$50,000                         | 41 (61)                      | 41 (62)                        |                  |
| ≥\$50,000                         | 15 (22)                      | 19 (29)                        |                  |
| Don't know                        | 11 (16)                      | 6 (9)                          |                  |
| Born in US – no. (%)              | 37 (55)                      | 35 (51)                        | 0.61             |
| Faith – no. (%)                   |                              |                                | 0.75             |
| Catholic                          | 19 (29)                      | 20 (29)                        |                  |
| Jewish                            | 7 (11)                       | 4 (6)                          |                  |
| Do not practice/believe           | 17 (26)                      | 21 (31)                        |                  |
| Other                             | 23 (35)                      | 23 (34)                        |                  |
| Health Care Proxy – no. (%)       |                              |                                | 0.45             |
| No                                | 26 (39)                      | 29 (42)                        |                  |
| Yes                               | 34 (51)                      | 37 (54)                        |                  |
| Don't know                        | 7 (10)                       | 3 (4)                          |                  |
| Living Will – no. (%)             |                              |                                | 0.48             |
| No                                | 51 (76)                      | 47 (68)                        |                  |
| Yes                               | 13 (19)                      | 19 (28)                        |                  |
| Don't know                        | 3 (5)                        | 3 (4)                          |                  |
| Having insurance – no. (%)        | 65 (97)                      | 67 (97)                        | 1.00             |
| Cancer Type – no. (%)             |                              |                                | 0.53             |
| Breast                            | 7 (10)                       | 9 (13)                         |                  |
| Colorectal                        | 7 (10)                       | 9 (13)                         |                  |
| Lung                              | 10 (15)                      | 5 (7)                          |                  |
| Other                             | 43 (64)                      | 46 (67)                        |                  |
| Mood Outcome – no. /total no. (%) |                              |                                | 0.12             |
| Major Depressive Disorder†        | 19/65 (29)                   | 24/69 (35)                     |                  |
| Quality of life – total no.#      | N=67                         | N=68                           |                  |

| <b>eTable 2. (Continued.)</b> |                              |                                |                  |
|-------------------------------|------------------------------|--------------------------------|------------------|
| <b>Variable</b>               | <b>Usual Care<br/>(N=67)</b> | <b>Intervention<br/>(N=69)</b> | <b>P-Value**</b> |
| FACT-G scores                 | 59.82±16.77                  | 53.56±19.61                    | 0.06             |

\*Plus-minus values are means ±SD. Percentages may not total 100 because of rounding. ECOG denotes Eastern Cooperative Oncology Group, FACT-G Functional Assessment of Cancer Therapy – General Assessment. Variables are self-reported with the exception of Cancer Type, which was taken from the electronic medical record during the eligibility screening process.

\*\*P-values were calculated with the use of two-sided Fisher's exact tests for categorical variables and the Wilcoxon rank tests for continuous variables.

¶The ECOG scale, a measure of performance status, has a score that ranges from 0 to 4, with higher scores indicating a lower performance status.

§An ECOG performance status grade of 0 indicates that the participant is fully active, able to carry on all pre-disease performance without restriction; 1 that the participant is restricted in physically strenuous activity but ambulatory and able to carry out work of a light or sedentary nature; 2 that the participant is ambulatory and capable of all selfcare but unable to carry out and work activities along with up and about more than 50% of waking hours; 3 that the participant is capable of only limited selfcare along with confined to bed or chair more than 50% of waking hours; 4 that the participant is completely disabled, unable to carry on any selfcare along with totally confined to bed or chair.

‡The PHQ-9 is a nine-item measure that evaluates symptoms of major depressive disorder according to the criteria of the fourth edition of the *Diagnostic and Statistical Manual of Mental Disorders* (DSM-IV). Major depressive disorder was coded as a binary variable (Yes/No). A major depressive disorder was noted if a patient reported at least five of the nine symptoms of depression on the PHQ-9, with one of the five symptoms being depressed mood or a lack of pleasure. Symptoms had to be present for more than half the time over the past two weeks, except for the symptom of suicidal thoughts, which was included in the notation of major depressive disorder, if it was present at any time.

# The quality-of-life was assessed by the use of the measure FACT-G, on which scores range from 0-108, with higher scores indicating a better Quality-of-Life.

**eTable 3: Health Care Utilization: Hospice Use.**

Hospice Use among the Intervention and Usual care Group, at 180 days.

| <b>Hospice Use</b> | <b>Intervention<br/>(N=69)</b> | <b>Usual<br/>Care<br/>(N=67)</b> |
|--------------------|--------------------------------|----------------------------------|
| Yes, no. (%)       | 19 (28)                        | 17 (25)                          |
| No, no. (%)        | 50 (72)                        | 50 (75)                          |

Chi-square, P-value = 0.93; Fisher's exact P-value = 0.85



**eTable 4: Health Care Utilization: Hospital Days.**

| <b>Hospital Days</b>                                     | <b>Intervention<br/>(N=69)</b> | <b>Usual Care<br/>(N=67)</b> | <b>Wilcoxon rank<br/>test P-value</b> |
|----------------------------------------------------------|--------------------------------|------------------------------|---------------------------------------|
| Hospital days during index admission, mean $\pm$ SD      | 7.00 $\pm$ 6.81                | 5.85 $\pm$ 4.74              | 0.67                                  |
| Hospital days at 180 days from enrollment, mean $\pm$ SD | 17.45 $\pm$ 20.18              | 10.93 $\pm$ 9.33             | 0.14                                  |

Hospital Days among the Intervention and Usual care Group, during the index-admission and at 180 days from enrollment.

## eTable 5: Health Care Utilization: Intensive Care Unit (ICU) Admission

Intensive Care Unit (ICU) Admission among the Intervention and Usual Care Groups, during the index-admission (5.A.), and at 180 days from enrollment (5.B.).

### 5.A. ICU Admission, during the index-admission.

| <b>ICU Admission,<br/>index-admission</b> | <b>Intervention<br/>(N=69)</b> | <b>Usual Care<br/>(N=67)</b> |
|-------------------------------------------|--------------------------------|------------------------------|
| Yes, no. (%)                              | 5 (7)                          | 4 (6)                        |
| No, no. (%)                               | 64 (93)                        | 5 (7)                        |

Fisher's exact test P-value = 1.00

### 5.B. ICU Admission, 180 days from enrollment.

| <b>ICU Admission, 180<br/>days</b> | <b>Intervention<br/>(N=69)</b> | <b>Usual Care<br/>(N=67)</b> |
|------------------------------------|--------------------------------|------------------------------|
| Yes, no. (%)                       | 6 (9)                          | 5 (7)                        |
| No, no. (%)                        | 63 (91)                        | 62 (93)                      |

Fisher's exact test P-value =1.00
